# Supplementary material for: Influence of surface chemistry on the formation of a protein corona on nanodiamonds
Source: Royal Society of Chemistry journal article supplement (doi:10.1039/c9tb00445a), 2019-01-01
Supplement: c9tb00445a1.pdf [file c9tb00445a1.pdf]

Electronic Supporting Information for:

## Formation of the Protein Corona on Nanodiamonds

A. E. Garcia-Bennett, Arun E. Dass, Ishan Das Rastogi, Irene Moroni, Lindsay Parker, Nicolle Paker and Louise Brown

SI-1. Materials Characterisation of zinc Oxide particles

SI-2. Zeta potential and Fourier Transform Infrared (FT-IR) spectra of as-received and purified NDs,

SI-3. Proteomics data: abundance versus protein number and *Heat* map for the full protein data of NDs

SI-4-7 Additional Proteomics data and PRIDE access details

**Fig. S1** (a) X-ray diffraction (XRD) patterns of highly crystalline zinc oxide nanoparticles showing characteristic peaks for the wurtzite structure with some peaks assigned to undetermined impurities. (b) Dynamic Light Scattering particle size distribution of zinc oxide particles. (c) XRD pattern of amine functionalised nanodiamonds (NH<sub>2</sub>-NDs) and characteristic TEM image of NH<sub>2</sub>-NDs showing the agglomerated particles.

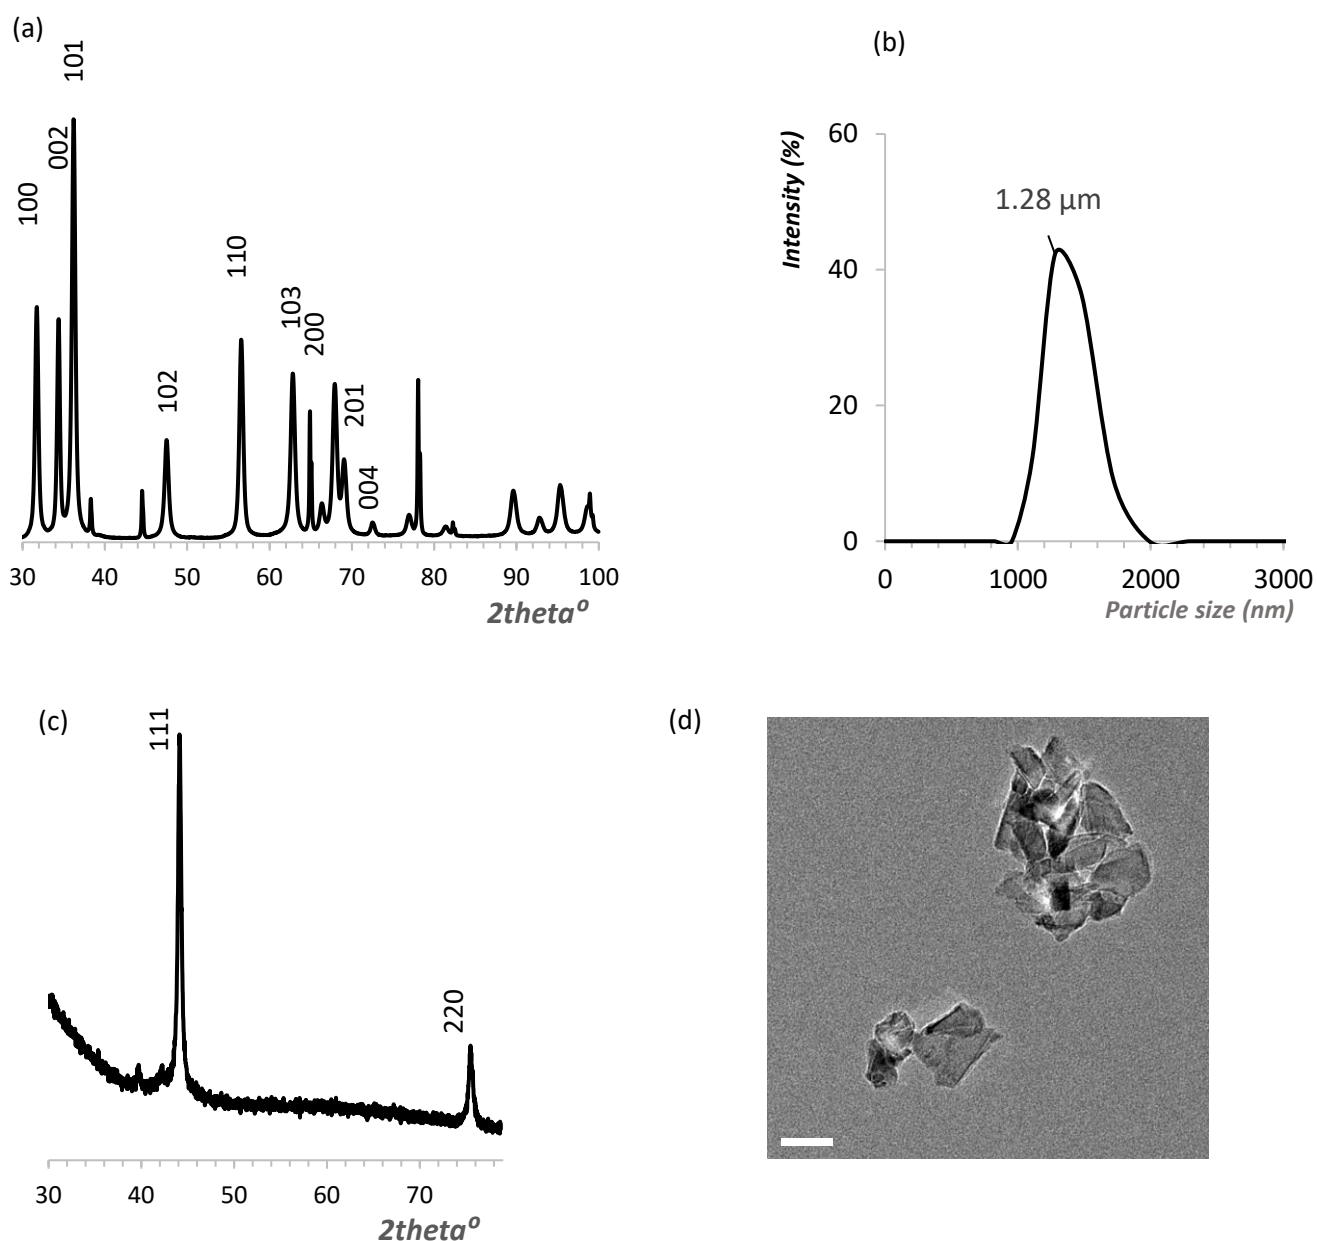

## Formation of the Protein Corona on Nanodiamonds

**Fig. S2** (a) Zeta potential measurements for AS-NDs and PUR-NDs conducted in water media. (b) FT-IR spectra of NDs and (c) enlarged selected areas of FT-IR spectra of NDs (omitted y-axis represents intensity in arbitrary units). (d) Raman spectra of the powdered ND samples recorded after excitation at 632.8 nm, showing the following features: G and D bands (1400-1500  $\text{cm}^{-1}$  and 1550-1700  $\text{cm}^{-1}$ ), main diamond peak centred around 1320  $\text{cm}^{-1}$  and the amorphous carbon region (<1300  $\text{cm}^{-1}$ ). Note a considerable sharpening of the diamond peak as a result of the purification process indicative of more exposed diamond particle core in comparison to AS-NDs.

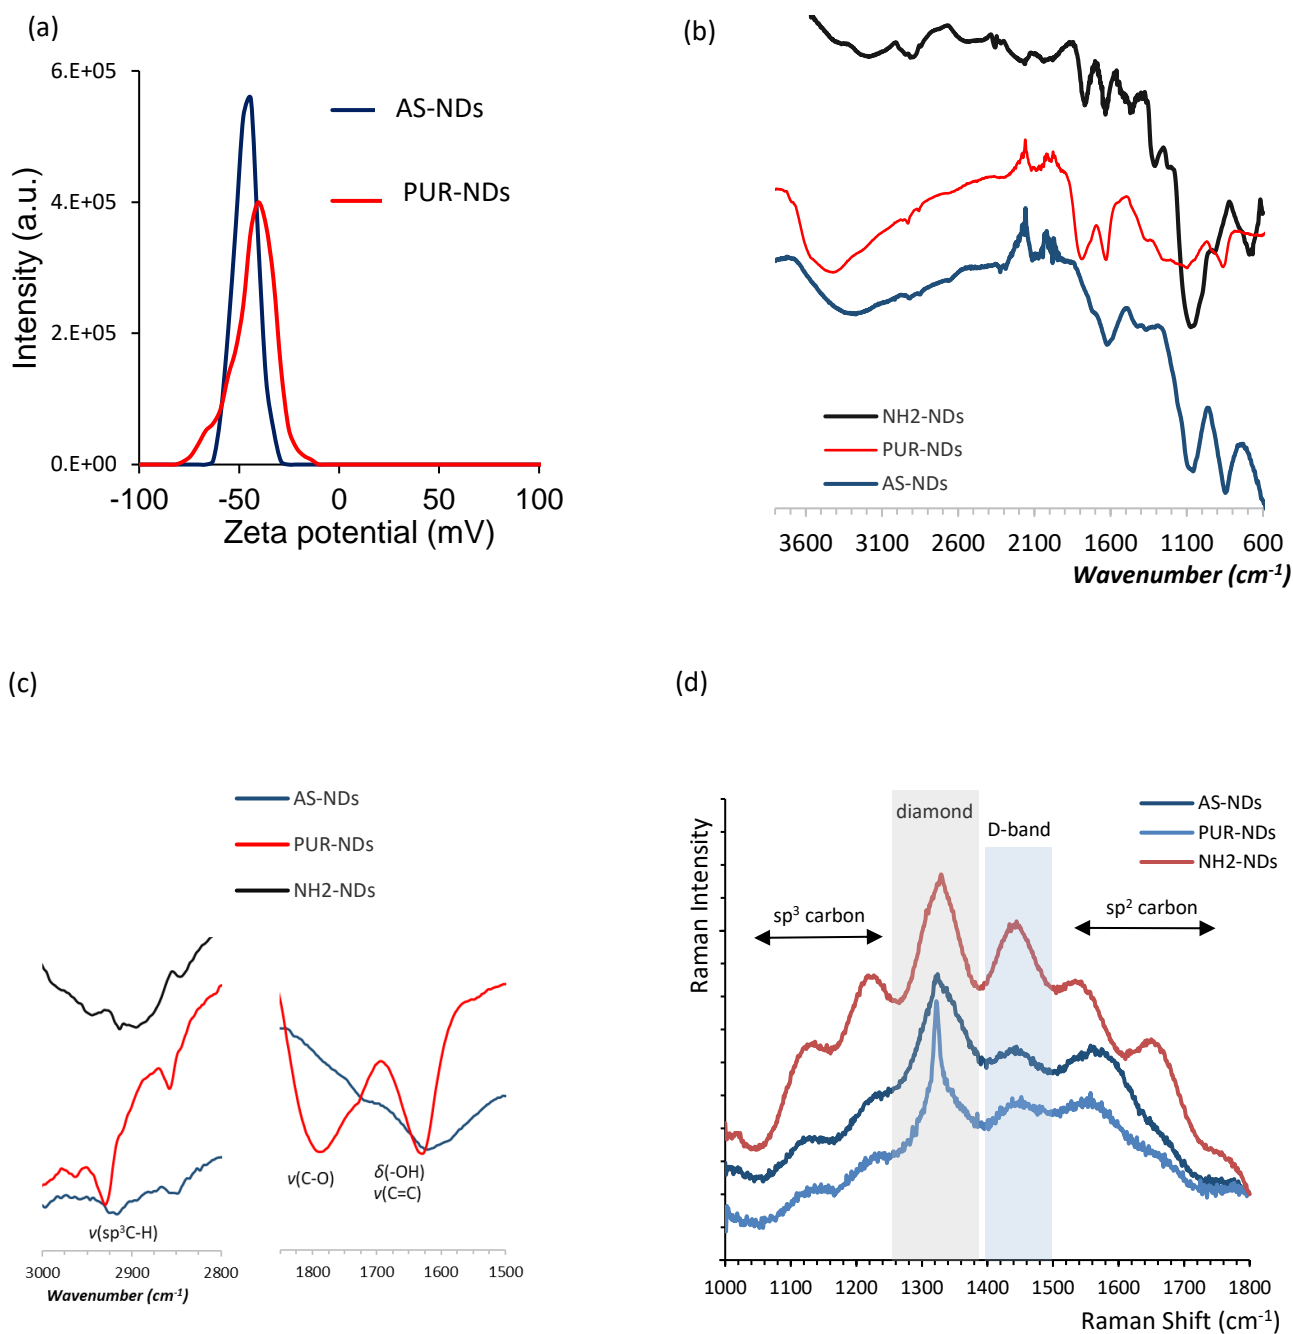

## Formation of the Protein Corona on Nanodiamonds

**Fig. S3 (a)** Abundance versus number of proteins detected from protein corona samples prepared for all materials at low serum concentration ( $S_1$ ) and short incubation times (1 minute) and high serum concentrations ( $S_{10}$ ) and long times (30 minutes). The plot demonstrates that the top 30 proteins dominate the corona. **(b)** Heat map for the full protein data set for all ND samples showing four major protein clusters (rows), and a large variability in the abundance of proteins as a function of type of functional group of the nanodiamond surface. A full list of proteins found is included at the end of this document.

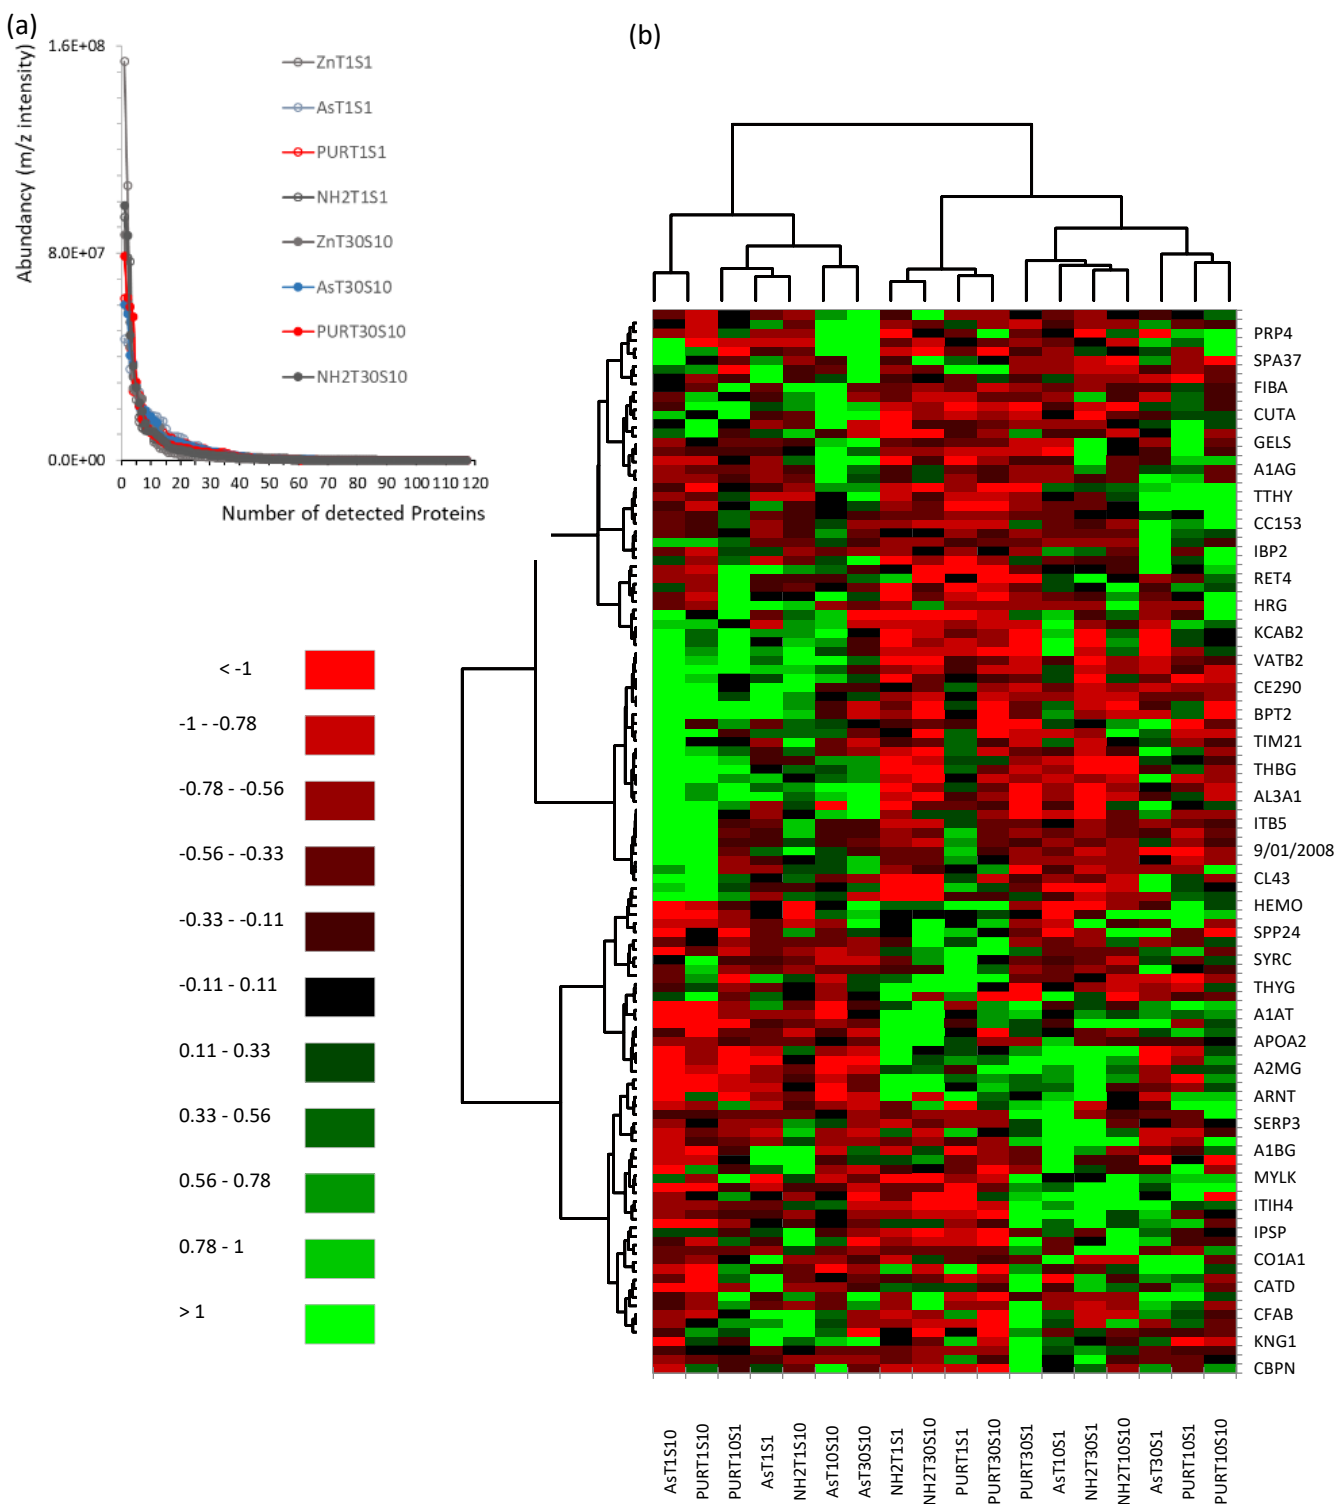

**Formation of the Protein Corona on Nanodiamonds****Table S4** Composition of the Top 10 proteins for coronas of as received A-NDs, purified P-NDs, NH<sub>2</sub>-NDs and zinc oxide particles (Zn-) as a function of serum concertation (S-) and incubation time (T-). Values are expressed as a percentage of the total abundancy.

| <b>AsT<sub>1</sub>S<sub>1</sub></b>   | <b>%</b> | <b>AsT<sub>10</sub>S<sub>1</sub></b>        | <b>%</b> | <b>AsT<sub>30</sub>S<sub>1</sub></b>        | <b>%</b> |
|---------------------------------------|----------|---------------------------------------------|----------|---------------------------------------------|----------|
| α-1-antiproteinase                    | 9.35     | Cullin                                      | 15.30    | α-1-antiproteinase                          | 15.70    |
| Hemoglobin-α                          | 9.02     | α-1-antiproteinase                          | 12.11    | Hemoglobin-α                                | 15.40    |
| Spleen trypsin inhibitor              | 7.03     | Hemoglobin-α                                | 8.65     | Prosalusin                                  | 9.27     |
| Vitamin K-depend. protein C           | 6.66     | α-2-macroglobulin                           | 7.66     | Vitamin K-depend. protein C                 | 8.47     |
| Protein CutA                          | 5.64     | Protein CutA                                | 6.14     | Protein CutA                                | 5.57     |
| Prosalusin                            | 5.28     | Spleen trypsin inhibitor                    | 5.24     | Cullin                                      | 3.44     |
| Cathepsin D                           | 3.76     | Prosalusin                                  | 3.29     | α-2-macroglobulin                           | 3.41     |
| Clusterin                             | 3.74     | SCO-spondin                                 | 2.98     | SCO-spondin                                 | 3.30     |
| α-2-macroglobulin                     | 3.71     | Complement factor D                         | 2.82     | 60S ribosomal protein                       | 2.87     |
| Aldehyde dehydrogenase                | 3.47     | Clusterin                                   | 2.46     | Prefoldin subunit 4                         | 2.37     |
| <b>AsT<sub>1</sub>S<sub>10</sub></b>  | <b>%</b> | <b>AsT<sub>10</sub>S<sub>10</sub></b>       | <b>%</b> | <b>AsT<sub>30</sub>S<sub>10</sub></b>       | <b>%</b> |
| Vitamin K-depend. protein C           | 10.20    | Protein CutA                                | 14.17    | α-1-antiproteinase                          | 14.17    |
| Protein CutA                          | 9.69     | Hemoglobin-α                                | 6.79     | Protein CutA                                | 6.79     |
| Spleen trypsin inhibitor              | 8.05     | Prosalusin                                  | 6.38     | Hemoglobin-α                                | 6.38     |
| SCO-spondin                           | 6.47     | α-1-antiproteinase                          | 6.04     | Prosalusin                                  | 6.04     |
| Peptidase inhibitor 16                | 5.34     | Vitamin K-depend. protein C                 | 5.23     | Vitamin K-depend. protein C                 | 5.23     |
| Clusterin                             | 4.26     | Cullin                                      | 3.93     | 60S ribosomal protein L19                   | 3.93     |
| Aldehyde dehydrogenase                | 4.19     | Prefoldin subunit 4                         | 3.78     | Prefoldin subunit 4                         | 3.78     |
| Prefoldin subunit 4                   | 3.96     | Spleen trypsin inhibitor                    | 3.25     | Cullin                                      | 3.25     |
| 60S ribosomal protein L19             | 3.93     | SCO-spondin                                 | 3.23     | Aldehyde dehydrogenase                      | 3.23     |
| Pantetheinase                         | 3.08     | 60S ribosomal protein L19                   | 3.11     | SCO-spondin                                 | 3.11     |
| <b>PURT<sub>1</sub>S<sub>1</sub></b>  | <b>%</b> | <b>PURT<sub>10</sub>S<sub>1</sub></b>       | <b>%</b> | <b>PURT<sub>30</sub>S<sub>1</sub></b>       | <b>%</b> |
| α-1-antiproteinase                    | 12.49    | A-1-antiproteinase                          | 14.07    | α-1-antiproteinase                          | 16.87    |
| Cullin                                | 12.38    | Prosalusin                                  | 8.14     | Cullin                                      | 15.40    |
| Hemoglobin-α                          | 8.70     | Protein CutA                                | 7.43     | α-2-macroglobulin                           | 11.02    |
| Prosalusin                            | 5.32     | α-2-macroglobulin                           | 6.26     | Hemoglobin-α                                | 10.51    |
| α-2-macroglobulin                     | 5.28     | Hemoglobin-α                                | 6.20     | Prosalusin                                  | 5.27     |
| SCO-spondin                           | 5.05     | Cullin                                      | 6.11     | Protein CutA                                | 3.23     |
| Vitamin K-depend. protein C           | 4.10     | Spleen trypsin inhibitor                    | 4.82     | Spleen trypsin inhibitor                    | 2.91     |
| Spleen trypsin inhibitor              | 3.69     | Glycolipid transfer protein                 | 3.61     | Cathepsin D                                 | 2.86     |
| Protein CutA                          | 3.48     | SU4/U6 small nuclear ribonucleoprotein Prp4 | 2.70     | SCO-spondin                                 | 2.59     |
| Prefoldin subunit 4                   | 2.65     | Cathepsin D                                 | 2.67     | Vitamin K-depend. protein C                 | 2.45     |
| <b>PURT<sub>1</sub>S<sub>10</sub></b> | <b>%</b> | <b>PURT<sub>10</sub>S<sub>10</sub></b>      | <b>%</b> | <b>PURT<sub>30</sub>S<sub>10</sub></b>      | <b>%</b> |
| SCO-spondin                           | 9.08     | α-1-antiproteinase                          | 15.86    | α-1-antiproteinase                          | 15.75    |
| Vitamin K-depend. protein C           | 6.94     | Cullin                                      | 12.20    | Hemoglobin-α                                | 12.53    |
| Spleen trypsin inhibitor              | 6.76     | Hemoglobin-α                                | 10.76    | α-2-macroglobulin                           | 11.83    |
| Protein CutA                          | 6.19     | Protein CutA                                | 7.37     | Cullin                                      | 11.09    |
| Cullin                                | 5.54     | Prosalusin                                  | 7.21     | Prosalusin                                  | 6.01     |
| 60S ribosomal protein L19             | 4.27     | α-2-macroglobulin                           | 6.47     | Protein CutA                                | 4.21     |
| α-1-antiproteinase                    | 3.99     | SU4/U6 small nuclear ribonucleoprotein Prp4 | 3.91     | SU4/U6 small nuclear ribonucleoprotein Prp4 | 3.19     |
| Clusterin                             | 3.85     | SCO-spondin                                 | 2.95     | SCO-spondin                                 | 2.91     |
| Septin-8                              | 3.67     | Vitamin K-depend. protein C                 | 2.14     | Keratin                                     | 2.49     |
| Peptidase inhibitor 16                | 3.31     | Vitamin D-binding protein                   | 1.98     | Prefoldin subunit 4                         | 2.11     |

**Formation of the Protein Corona on Nanodiamonds**

| <b>NH<sub>2</sub>T<sub>1</sub>S<sub>1</sub></b>  | <b>%</b> | <b>NH<sub>2</sub>T<sub>10</sub>S<sub>1</sub></b>  | <b>%</b> | <b>NH<sub>2</sub>T<sub>30</sub>S<sub>1</sub></b>  | <b>%</b> |
|--------------------------------------------------|----------|---------------------------------------------------|----------|---------------------------------------------------|----------|
| A-1-antiproteinase                               | 18.77    | Protein CutA                                      | 13.02    | A-1-antiproteinase                                | 15.64    |
| Cullin                                           | 15.63    | A-1-antiproteinase                                | 9.48     | Cullin                                            | 15.23    |
| Hemoglobin- $\alpha$                             | 15.33    | Spleen trypsin inhibitor                          | 7.00     | Hemoglobin- $\alpha$                              | 14.91    |
| A-2-macroglobulin                                | 6.45     | Vitamin K-depend. protein C                       | 5.73     | A-2-macroglobulin                                 | 10.14    |
| Prosalusin                                       | 5.33     | Hemoglobin- $\alpha$                              | 4.80     | Prosalusin                                        | 4.77     |
| Keratin                                          | 3.32     | Prefoldin subunit 4                               | 4.17     | Cathepsin D                                       | 2.62     |
| SCO-spondin                                      | 2.53     | Peptidase inhibitor 16                            | 3.90     | Protein CutA                                      | 2.60     |
| Protein CutA                                     | 2.32     | Cullin                                            | 3.89     | Keratin                                           | 2.60     |
| Cathepsin D                                      | 2.31     | Prosalusin                                        | 3.84     | SCO-spondin                                       | 2.52     |
| Spleen trypsin inhibitor                         | 2.28     | Complement factor D                               | 3.81     | Apolipoprotein A-I                                | 2.13     |
| <b>NH<sub>2</sub>T<sub>1</sub>S<sub>10</sub></b> | <b>%</b> | <b>NH<sub>2</sub>T<sub>10</sub>S<sub>10</sub></b> | <b>%</b> | <b>NH<sub>2</sub>T<sub>30</sub>S<sub>10</sub></b> | <b>%</b> |
| Cullin                                           | 9.29     | Hemoglobin- $\alpha$                              | 15.74    | $\alpha$ -1-antiproteinase                        | 19.65    |
| $\alpha$ -1-antiproteinase                       | 9.14     | $\alpha$ -1-antiproteinase                        | 13.39    | Hemoglobin- $\alpha$                              | 17.29    |
| Hemoglobin- $\alpha$                             | 7.19     | Cullin                                            | 11.63    | Cullin                                            | 9.66     |
| Spleen trypsin inhibitor                         | 6.13     | Prosalusin                                        | 7.65     | A-2-macroglobulin                                 | 7.27     |
| SCO-spondin                                      | 5.18     | A-2-macroglobulin                                 | 6.87     | Prosalusin                                        | 5.65     |
| Protein CutA                                     | 4.81     | Protein CutA                                      | 5.19     | Protein CutA                                      | 4.43     |
| Vitamin K-depend. protein C                      | 4.12     | SCO-spondin                                       | 2.83     | Keratin                                           | 3.80     |
| A-2-macroglobulin                                | 3.98     | Pantetheinase                                     | 2.48     | SCO-spondin                                       | 2.83     |
| Prefoldin subunit 4                              | 3.07     | Complement factor D                               | 2.36     | Vitamin D-binding                                 | 2.25     |
| Prosalusin                                       | 3.02     | SU4/U6 small nuclear ribonucleoprotein Prp4       | 2.35     | Cathepsin D                                       | 2.24     |

| <b>ZnT<sub>1</sub>S<sub>1</sub></b>        | <b>%</b> | <b>ZnT<sub>10</sub>S<sub>1</sub></b>       | <b>%</b> | <b>ZnT<sub>30</sub>S<sub>1</sub></b>  | <b>%</b> |
|--------------------------------------------|----------|--------------------------------------------|----------|---------------------------------------|----------|
| Spleen trypsin inhibitor I                 | 30.74    | Cullin                                     | 17.08    | $\alpha$ -1-antiproteinase            | 19.65    |
| Clusterin (Glycoprotein III)               | 21.18    | $\alpha$ -1-antiproteinase                 | 16.88    | Prosalusin                            | 19.19    |
| $\alpha$ -1-antiproteinase                 | 10.65    | Prosalusin                                 | 12.64    | Cullin                                | 18.89    |
| Hemoglobin- $\alpha$                       | 5.51     | Hemoglobin- $\alpha$                       | 8.86     | Hemoglobin- $\alpha$                  | 11.74    |
| Protein CutA                               | 4.68     | SCO-spondin                                | 6.41     | $\alpha$ -2-macroglobulin             | 5.69     |
| $\alpha$ -2-macroglobulin                  | 2.96     | Protein CutA                               | 5.48     | SCO-spondin                           | 3.44     |
| Prosalusin                                 | 2.48     | $\alpha$ -2-macroglobulin                  | 4.14     | 60S ribosomal protein                 | 2.35     |
| Centrosomal protein                        | 2.43     | 60S ribosomal protein L19                  | 3.63     | Protein CutA                          | 1.42     |
| Cullin                                     | 2.33     | U4/U6 small nuclear ribonucleoprotein Prp4 | 1.87     | Pantetheinase                         | 1.25     |
| Apolipoprotein                             | 2.12     | Spleen trypsin inhibitor I                 | 1.65     | Complement C9                         | 1.06     |
| <b>ZnT<sub>1</sub>S<sub>10</sub></b>       | <b>%</b> | <b>ZnT<sub>10</sub>S<sub>10</sub></b>      | <b>%</b> | <b>ZnT<sub>30</sub>S<sub>10</sub></b> | <b>%</b> |
| $\alpha$ -1-antiproteinase                 | 14.17    | Prosalusin                                 | 16.22    | Serum albumin                         | 17.39    |
| Prosalusin                                 | 11.70    | $\alpha$ -1-antiproteinase                 | 14.98    | $\alpha$ -1-antiproteinase            | 11.78    |
| Cullin                                     | 11.61    | Cullin                                     | 14.01    | $\alpha$ -2-HS-glycoprotein           | 8.73     |
| Protein CutA                               | 9.65     | Hemoglobin- $\alpha$                       | 10.92    | Keratin                               | 5.54     |
| SCO-spondin                                | 8.31     | SCO-spondin                                | 5.37     | Serotransferrin                       | 5.33     |
| Hemoglobin- $\alpha$                       | 7.95     | Protein CutA                               | 5.33     | Hemoglobin- $\alpha$                  | 4.87     |
| 60S ribosomal protein L19                  | 3.98     | 60S ribosomal protein L19                  | 4.43     | $\alpha$ -fetoprotein                 | 4.71     |
| U4/U6 small nuclear ribonucleoprotein Prp4 | 3.03     | $\alpha$ -2-macroglobulin                  | 3.97     | Apolipoprotein A-I                    | 3.16     |
| Septin-8                                   | 2.46     | U4/U6 small nuclear ribonucleoprotein Prp4 | 3.01     | $\alpha$ -2-macroglobulin             | 3.02     |
| Spleen trypsin inhibitor I                 | 2.40     | Septin-8                                   | 2.40     | Keratin                               | 2.92     |

## Formation of the Protein Corona on Nanodiamonds

**Fig. S5** Molecular Weight Distribution of the top 30 proteins measured in Zinc Oxide particles incubated at different time points at serum concentrations of 1% (ZnS1) and 10% (ZnS10).

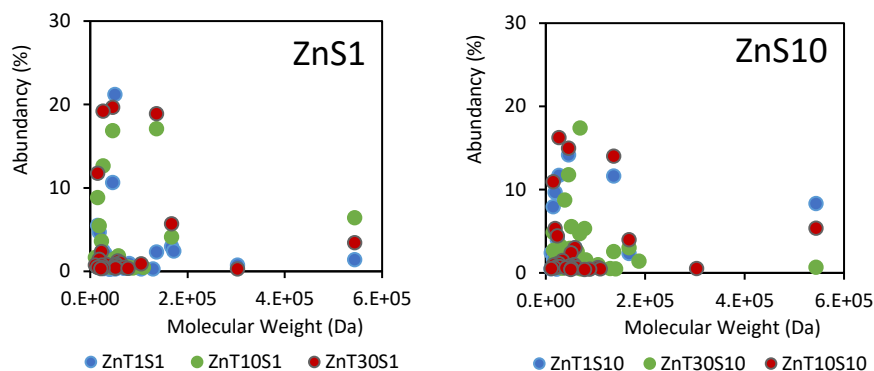

**Fig. S6** Isoelectric point (pI) of the top 10 proteins for the protein corona of selected NDs. Theoretical pI obtained from the ExPaSy online freeware package (SIB Swiss Institute of Bioinformatics, [https://web.expasy.org/compute\\_pi/](https://web.expasy.org/compute_pi/))

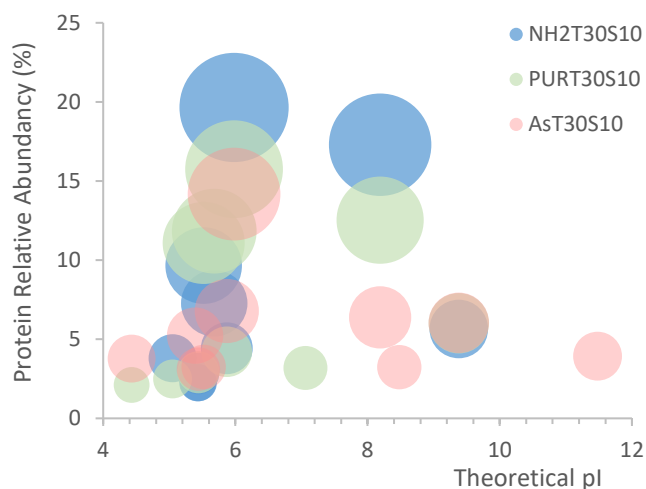

**S7.** Raw mass spectra data files and SWATH library in PRIDE which can be accessed free of charge, with the details below:

Project accession: PXD013437

Username: [reviewer47244@ebi.ac.uk](mailto:reviewer47244@ebi.ac.uk)

Password: hHRXlXKc
